# Supplementary material
Source: publisher figshare collection journal article supplement (https://sage.figshare.com/ndownloader/files/18725192)
Supplement: Supplementary file 1 [file 18725192]

## APPENDIX 1 - Complete search strategy on databases

### • PubMed

|    |                                                                                                                                                                                                                                                                                                                                                                                                                                                                                                                                                                                                                                                                                                                                                                                                                                                                                                                                                                                                                                                                                                                                                                                                                                                                                                                                                                               |
|----|-------------------------------------------------------------------------------------------------------------------------------------------------------------------------------------------------------------------------------------------------------------------------------------------------------------------------------------------------------------------------------------------------------------------------------------------------------------------------------------------------------------------------------------------------------------------------------------------------------------------------------------------------------------------------------------------------------------------------------------------------------------------------------------------------------------------------------------------------------------------------------------------------------------------------------------------------------------------------------------------------------------------------------------------------------------------------------------------------------------------------------------------------------------------------------------------------------------------------------------------------------------------------------------------------------------------------------------------------------------------------------|
| #1 | Search (((((((((((("Outcome Assessment (Health Care)"[Mesh]) OR "Patient Outcome Assessment"[Mesh]) AND "Drug Therapy"[Mesh]) OR "Polypharmacy"[Mesh]) OR Complexity) OR "Drug therapy complexity") OR "Medication complexity") OR "Medication regimen") OR "Medication regimen complexity") OR "Regimen complexity") OR "Treatment complexity") AND "Medication regimen complexity index") OR "MRCI"                                                                                                                                                                                                                                                                                                                                                                                                                                                                                                                                                                                                                                                                                                                                                                                                                                                                                                                                                                         |
| #2 | Search (((((((((((("Outcome assessment ") OR "Patient Outcome Assessment ") AND "Drug Therapy ") OR "Polypharmacy") OR Complexity) OR "Drug therapy complexity") OR "Medication complexity") OR "Medication regimen") OR "Medication regimen complexity") OR "Regimen complexity") OR "Treatment complexity") AND "Medication regimen complexity index") OR "MRCI"                                                                                                                                                                                                                                                                                                                                                                                                                                                                                                                                                                                                                                                                                                                                                                                                                                                                                                                                                                                                            |
| #3 | Search (((((((((((((((((((((((((((((((("Outcome assessment") OR "Assessment, Outcome") OR "Assessments, Outcome") OR "Outcome Assessments") OR "Outcomes Assessment") OR "Assessment, Outcomes") OR "Assessments, Outcomes") OR "Outcomes Assessments") OR "Outcomes Research") OR "Research, Outcomes") OR "Outcome Studies") OR "Outcome Study") OR "Studies, Outcome") OR "Study, Outcome") OR "Outcome Measures") OR "Measure, Outcome") OR "Measures, Outcome") OR "Outcome Measure") OR "Patient Outcome Assessment") OR "Assessments, Patient Outcome") OR "Outcome Assessments, Patient") OR "Patient Outcome Assessments") OR "Assessment, Patient Outcomes") OR "Patient Outcomes Assessment") OR "Outcomes Assessments, Patient") OR "Patient-Centered Outcomes Research") OR "Patient Centered Outcomes Research") OR "Research, Patient-Centered Outcomes") OR "Assessment, Patient Outcome") OR "Outcome Assessment, Patient") AND "Drug Therapy") OR "Therapy, Drug") OR "Drug Therapies") OR "Therapies, Drug") OR Chemotherapy) OR Chemotherapies) OR Pharmacotherapy) OR Pharmacotherapies) OR Polypharmacy) OR Complexity) OR "Drug therapy complexity") OR "Medication complexity") OR "Medication regimen") OR "Medication regimen complexity") OR "Regimen complexity") OR "Treatment complexity") AND "Medication regimen complexity index") OR "MRCI" |

### • Scopus

|    |                                                                                                                                                                                                                                                                                                                                                                                                                                                                                                                                                                                                                                                                                                                                                                                                                                                                                                                                                                                                                                                                                                                             |
|----|-----------------------------------------------------------------------------------------------------------------------------------------------------------------------------------------------------------------------------------------------------------------------------------------------------------------------------------------------------------------------------------------------------------------------------------------------------------------------------------------------------------------------------------------------------------------------------------------------------------------------------------------------------------------------------------------------------------------------------------------------------------------------------------------------------------------------------------------------------------------------------------------------------------------------------------------------------------------------------------------------------------------------------------------------------------------------------------------------------------------------------|
| #1 | ( ALL ( "Medication regimen complexity index" ) OR ALL ( "MRCI" ) )                                                                                                                                                                                                                                                                                                                                                                                                                                                                                                                                                                                                                                                                                                                                                                                                                                                                                                                                                                                                                                                         |
| #2 | ( ALL ( "Drug Therapy" ) OR ALL ( "Therapy, Drug" ) OR ALL ( "Drug Therapies" ) OR ALL ( "Therapies, Drug" ) OR ALL ( chemotherapy ) OR ALL ( chemotherapies ) OR ALL ( pharmacotherapy ) OR ALL ( pharmacotherapies ) OR ALL ( polypharmacy ) OR ALL ( complexity ) OR ALL ( "Drug therapy complexity" ) OR ALL ( "Medication complexity" ) OR ALL ( "Medication regimen" ) OR ALL ( "Medication regimen complexity" ) OR ALL ( "Regimen complexity" ) OR ALL ( "Treatment complexity" ) )                                                                                                                                                                                                                                                                                                                                                                                                                                                                                                                                                                                                                                 |
| #3 | ( ALL ( "Outcome assessment" ) OR ALL ( "Assessment, Outcome" ) OR ALL ( "Assessments, Outcome" ) OR ALL ( "Outcome Assessments" ) OR ALL ( "Outcomes Assessment" ) OR ALL ( "Assessment, Outcomes" ) OR ALL ( "Assessments, Outcomes" ) OR ALL ( "Outcomes Assessments" ) OR ALL ( "Outcomes Research" ) OR ALL ( "Research, Outcomes" ) OR ALL ( "Outcome Studies" ) OR ALL ( "Outcome Study" ) OR ALL ( "Studies, Outcome" ) OR ALL ( "Study, Outcome" ) OR ALL ( "Outcome Measures" ) OR ALL ( "Measure, Outcome" ) OR ALL ( "Measures, Outcome" ) OR ALL ( "Outcome Measure" ) OR ALL ( "Patient Outcome Assessment" ) OR ALL ( "Assessments, Patient Outcome" ) OR ALL ( "Outcome Assessments, Patient" ) OR ALL ( "Patient Outcome Assessments" ) OR ALL ( "Assessment, Patient Outcomes" ) OR ALL ( "Patient Outcomes Assessment" ) OR ALL ( "Outcomes Assessments, Patient" ) OR ALL ( "Patient-Centered Outcomes Research" ) OR ALL ( "Patient Centered Outcomes Research" ) OR ALL ( "Research, Patient-Centered Outcomes" ) OR ALL ( "Assessment, Patient Outcome" ) OR ALL ( "Outcome Assessment, Patient" ) ) |
| #4 | #1 AND #2 AND #3                                                                                                                                                                                                                                                                                                                                                                                                                                                                                                                                                                                                                                                                                                                                                                                                                                                                                                                                                                                                                                                                                                            |
| #5 | ( ( ALL ( "Medication regimen complexity index" ) OR ALL ( "MRCI" ) ) ) AND ( ( ALL ( "Drug Therapy" ) OR ALL ( "Therapy, Drug" ) OR ALL ( "Drug Therapies" ) OR ALL ( "Therapies, Drug" ) OR ALL ( chemotherapy ) OR ALL ( chemotherapies ) OR ALL ( pharmacotherapy ) OR ALL ( pharmacotherapies ) OR ALL ( polypharmacy ) OR ALL ( complexity ) OR ALL ( "Drug therapy complexity" ) OR ALL ( "Medication complexity" ) OR ALL ( "Medication regimen" ) OR ALL ( "Medication regimen complexity" ) OR ALL ( "Regimen complexity" ) OR ALL ( "Treatment complexity" ) ) ) AND ( ( ALL ( "Outcome assessment" ) OR ALL ( "Assessment, Outcome" ) OR ALL ( "Assessments, Outcome" ) OR ALL ( "Outcome Assessments" ) OR ALL ( "Outcomes Assessment" ) OR ALL ( "Assessment, Outcomes" ) OR ALL ( "Assessments, Outcomes" ) OR ALL ( "Outcomes Assessments" ) OR ALL ( "Outcomes Research" ) OR ALL ( "Research, Outcomes" ) OR ALL ( "Outcome Studies" ) OR ALL ( "Outcome Study" ) OR ALL                                                                                                                                  |

---

( "Studies, Outcome" ) OR ALL ( "Study, Outcome" ) OR ALL ( "Outcome Measures" ) OR ALL ( "Measure, Outcome" ) OR ALL ( "Measures, Outcome" ) OR ALL ( "Outcome Measure" ) OR ALL ( "Patient Outcome Assessment" ) OR ALL ( "Assessments, Patient Outcome" ) OR ALL ( "Outcome Assessments, Patient" ) OR ALL ( "Patient Outcome Assessments" ) OR ALL ( "Assessment, Patient Outcomes" ) OR ALL ( "Patient Outcomes Assessment" ) OR ALL ( "Outcomes Assessments, Patient" ) OR ALL ( "Patient-Centered Outcomes Research" ) OR ALL ( "Patient Centered Outcomes Research" ) OR ALL ( "Research, Patient-Centered Outcomes" ) OR ALL ( "Assessment, Patient Outcome" ) OR ALL ( "Outcome Assessment, Patient" ) ) )

---

- **Embase**

---

#1 'outcome assessment' OR 'assessment, outcome' OR 'assessments, outcome' OR 'outcome assessments' OR 'outcomes assessment' OR 'assessment, outcomes' OR 'assessments, outcomes' OR 'outcomes assessments' OR 'outcomes research' OR 'research, outcomes' OR 'outcome studies' OR 'outcome study' OR 'studies, outcome' OR 'study, outcome' OR 'outcome measures' OR 'measure, outcome' OR 'measures, outcome' OR 'outcome measure' OR 'patient outcome assessment' OR 'assessments, patient outcome' OR 'outcome assessments, patient' OR 'patient outcome assessments' OR 'assessment, patient outcomes' OR 'patient outcomes assessment' OR 'outcomes assessments, patient' OR 'patient-centered outcomes research' OR 'patient centered outcomes research' OR 'research, patient-centered outcomes' OR 'assessment, patient outcome' OR 'outcome assessment, patient'

---

#2 'drug therapy' OR 'therapy, drug' OR 'drug therapies' OR 'therapies, drug' OR 'chemotherapy' OR 'chemotherapies' OR 'pharmacotherapy' OR 'pharmacotherapies' OR 'complexity' OR 'medication complexity' OR 'drug therapy complexity' OR 'regimen complexity' OR 'treatment complexity' OR 'medication regimen' OR 'medication regimen complexity' OR 'polypharmacy'

---

#3 'medication regimen complexity index' OR 'mrci'

---

#4 #1 AND #2 AND #3

---

- **Lilacs**

---

#1 (tw:(((mh:"Outcome assessment") OR "Assessment, Outcome" OR "Assessments, Outcome" OR "Outcome Assessments" OR "Outcomes Assessment" OR "Assessment, Outcomes" OR "Assessments, Outcomes" OR "Outcomes Assessments" OR "Outcomes Research" OR "Research, Outcomes" OR "Outcome Studies" OR "Outcome Study" OR "Studies, Outcome" OR "Study, Outcome" OR "Outcome Measures" OR "Measure, Outcome" OR "Measures, Outcome" OR "Outcome Measure" OR (mh:"Patient Outcome Assessment") OR "Assessments, Patient Outcome" OR "Outcome Assessments, Patient" OR "Patient Outcome Assessments" OR "Assessment, Patient Outcomes" OR "Patient Outcomes Assessment" OR "Outcomes Assessments, Patient" OR "Patient-Centered Outcomes Research" OR "Patient Centered Outcomes Research" OR "Research, Patient-Centered Outcomes" OR "Assessment, Patient Outcome" OR "Outcome Assessment, Patient" ) ) AND (tw:((mh:"Drug Therapy" OR "Therapy, Drug" OR "Drug Therapies" OR "Therapies, Drug" OR "Chemotherapy" OR "Chemotherapies" OR "Pharmacotherapy" OR "Pharmacotherapies" OR "Complexity" OR "Medication complexity" OR "Drug therapy complexity" OR "Regimen complexity" OR "Treatment complexity" OR "Medication regimen" OR "Medication regimen complexity" OR (mh:"Polypharmacy")))) AND (tw:(("Medication regimen complexity index" OR "MRCI"))))

---

- **Open Thesis**

---

"Outcome assessment" OR "Assessment, Outcome" OR "Assessments, Outcome" OR "Outcome Assessments" OR "Outcomes Assessment" OR "Assessment, Outcomes" OR "Assessments, Outcomes" OR "Outcomes Assessments" OR "Outcomes Research" OR "Research, Outcomes" OR "Outcome Studies" OR "Outcome Study" OR "Studies, Outcome" OR "Study, Outcome" OR "Outcome Measures" OR "Measure, Outcome" OR "Measures, Outcome" OR "Outcome Measure" OR "Patient Outcome Assessment" OR "Assessments, Patient Outcome" OR "Outcome Assessments, Patient" OR "Patient Outcome Assessments" OR "Assessment, Patient Outcomes" OR "Patient Outcomes Assessment" OR "Outcomes Assessments, Patient" OR "Patient-Centered Outcomes Research" OR "Patient Centered Outcomes Research" OR "Research, Patient-Centered Outcomes" OR "Assessment, Patient Outcome" OR "Outcome Assessment, Patient" AND "Drug Therapy" OR "Therapy, Drug" OR "Drug Therapies" OR "Therapies, Drug" OR Chemotherapy OR Chemotherapies OR Pharmacotherapy OR Pharmacotherapies OR Polypharmacy OR Complexity OR "Drug therapy complexity" OR "Medication complexity" OR "Medication regimen" OR "Medication regimen complexity" OR "Regimen complexity" OR "Treatment complexity" AND "Medication regimen complexity index" OR "MRCI"

---

- **Web of Science**

---

---

**#1** Tópico: ("Outcome assessment") OR Tópico: ("Assessment, Outcome") OR Tópico: ("Assessments, Outcome") OR Tópico: ("Outcome Assessments") OR Tópico: ("Outcomes Assessment") OR Tópico: ("Assessment, Outcomes") OR Tópico: ("Assessments, Outcomes") OR Tópico: ("Outcomes Assessments") OR Tópico: ("Outcomes Research") OR Tópico: ("Research, Outcomes") OR Tópico: ("Outcome Studies") OR Tópico: ("Outcome Study") OR Tópico: ("Studies, Outcome") OR Tópico: ("Study, Outcome") OR Tópico: ("Outcome Measures") OR Tópico: ("Measure, Outcome") OR Tópico: ("Measures, Outcome") OR Tópico: ("Outcome Measure")

Índices=SCI-EXPANDED, SSCI, A&HCI, CPCI-S, CPCI-SSH, ESCI Tempo estipulado=Todos os anos

---

**#2** Tópico: ("Patient Outcome Assessment") OR Tópico: ("Assessments, Patient Outcome") OR Tópico: ("Outcome Assessments, Patient") OR Tópico: ("Patient Outcome Assessments") OR Tópico: ("Assessment, Patient Outcomes") OR Tópico: ("Patient Outcomes Assessment") OR Tópico: ("Outcomes Assessments, Patient") OR Tópico: ("Patient-Centered Outcomes Research") OR Tópico: ("Patient Centered Outcomes Research") OR Tópico: ("Research, Patient-Centered Outcomes") OR Tópico: ("Assessment, Patient Outcome") OR Tópico: ("Outcome Assessment, Patient")

Índices=SCI-EXPANDED, SSCI, A&HCI, CPCI-S, CPCI-SSH, ESCI Tempo estipulado=Todos os anos

---

**#3** Tópico: ("Drug Therapy") OR Tópico: ("Therapy, Drug") OR Tópico: ("Drug Therapies") OR Tópico: ("Therapies, Drug") OR Tópico: (Chemotherapy) OR Tópico: (Chemotherapies) OR Tópico: (Pharmacotherapy) OR Tópico: (Pharmacotherapies) OR Tópico: (Polypharmacy) OR Tópico: (Complexity) OR Tópico: ("Drug therapy complexity") OR Tópico: ("Medication complexity") OR Tópico: ("Medication regimen") OR Tópico: ("Medication regimen complexity") OR Tópico: ("Regimen complexity") OR Tópico: ("Treatment complexity")

Índices=SCI-EXPANDED, SSCI, A&HCI, CPCI-S, CPCI-SSH, ESCI Tempo estipulado=Todos os anos

---

**#4** Tópico: ("Medication regimen complexity index") OR Tópico: ("MRCI")

Índices=SCI-EXPANDED, SSCI, A&HCI, CPCI-S, CPCI-SSH, ESCI Tempo estipulado=Todos os anos

---

**#5** #2 OR #1

Índices=SCI-EXPANDED, SSCI, A&HCI, CPCI-S, CPCI-SSH, ESCI Tempo estipulado=Todos os anos

---

**#6** #5 AND #4 AND #3

Índices=SCI-EXPANDED, SSCI, A&HCI, CPCI-S, CPCI-SSH, ESCI Tempo estipulado=Todos os anos

---

• **The Cochrane Library**

---

**#1** "Outcome assessment" or "Assessment, Outcome" or "Assessments, Outcome" or "Outcome Assessments" or "Outcomes Assessment" or "Assessment, Outcomes" or "Assessments, Outcomes" or "Outcomes Assessments" or "Outcomes Research" or "Research, Outcomes" or "Outcome Studies" or "Outcome Study" or "Studies, Outcome" or "Study, Outcome" or "Outcome Measures" or "Measure, Outcome" or "Measures, Outcome" or "Outcome Measure" or "Patient Outcome Assessment" or "Assessments, Patient Outcome" or "Outcome Assessments, Patient" or "Patient Outcome Assessments" or "Assessment, Patient Outcomes" or "Patient Outcomes Assessment" or "Outcomes Assessments, Patient" or "Patient-Centered Outcomes Research" or "Patient Centered Outcomes Research" or "Research, Patient-Centered Outcomes" or "Assessment, Patient Outcome" or "Outcome Assessment, Patient" (Word variations have been searched)

---

**#2** "Drug Therapy" or "Therapy, Drug" or "Drug Therapies" or "Therapies, Drug" or "Chemotherapy" or "Chemotherapies" or "Pharmacotherapy" or "Pharmacotherapies" or "Complexity" or "Medication complexity" or "Drug therapy complexity" or "Regimen complexity" or "Treatment complexity" or "Medication regimen" or "Medication regimen complexity" or "Polypharmacy"

---

**#3** "Medication regimen complexity index" or "MRCI"

---

**#4** #1 and #2 and #3

---

## APPENDIX 2. Flow diagram of literature search and screening process

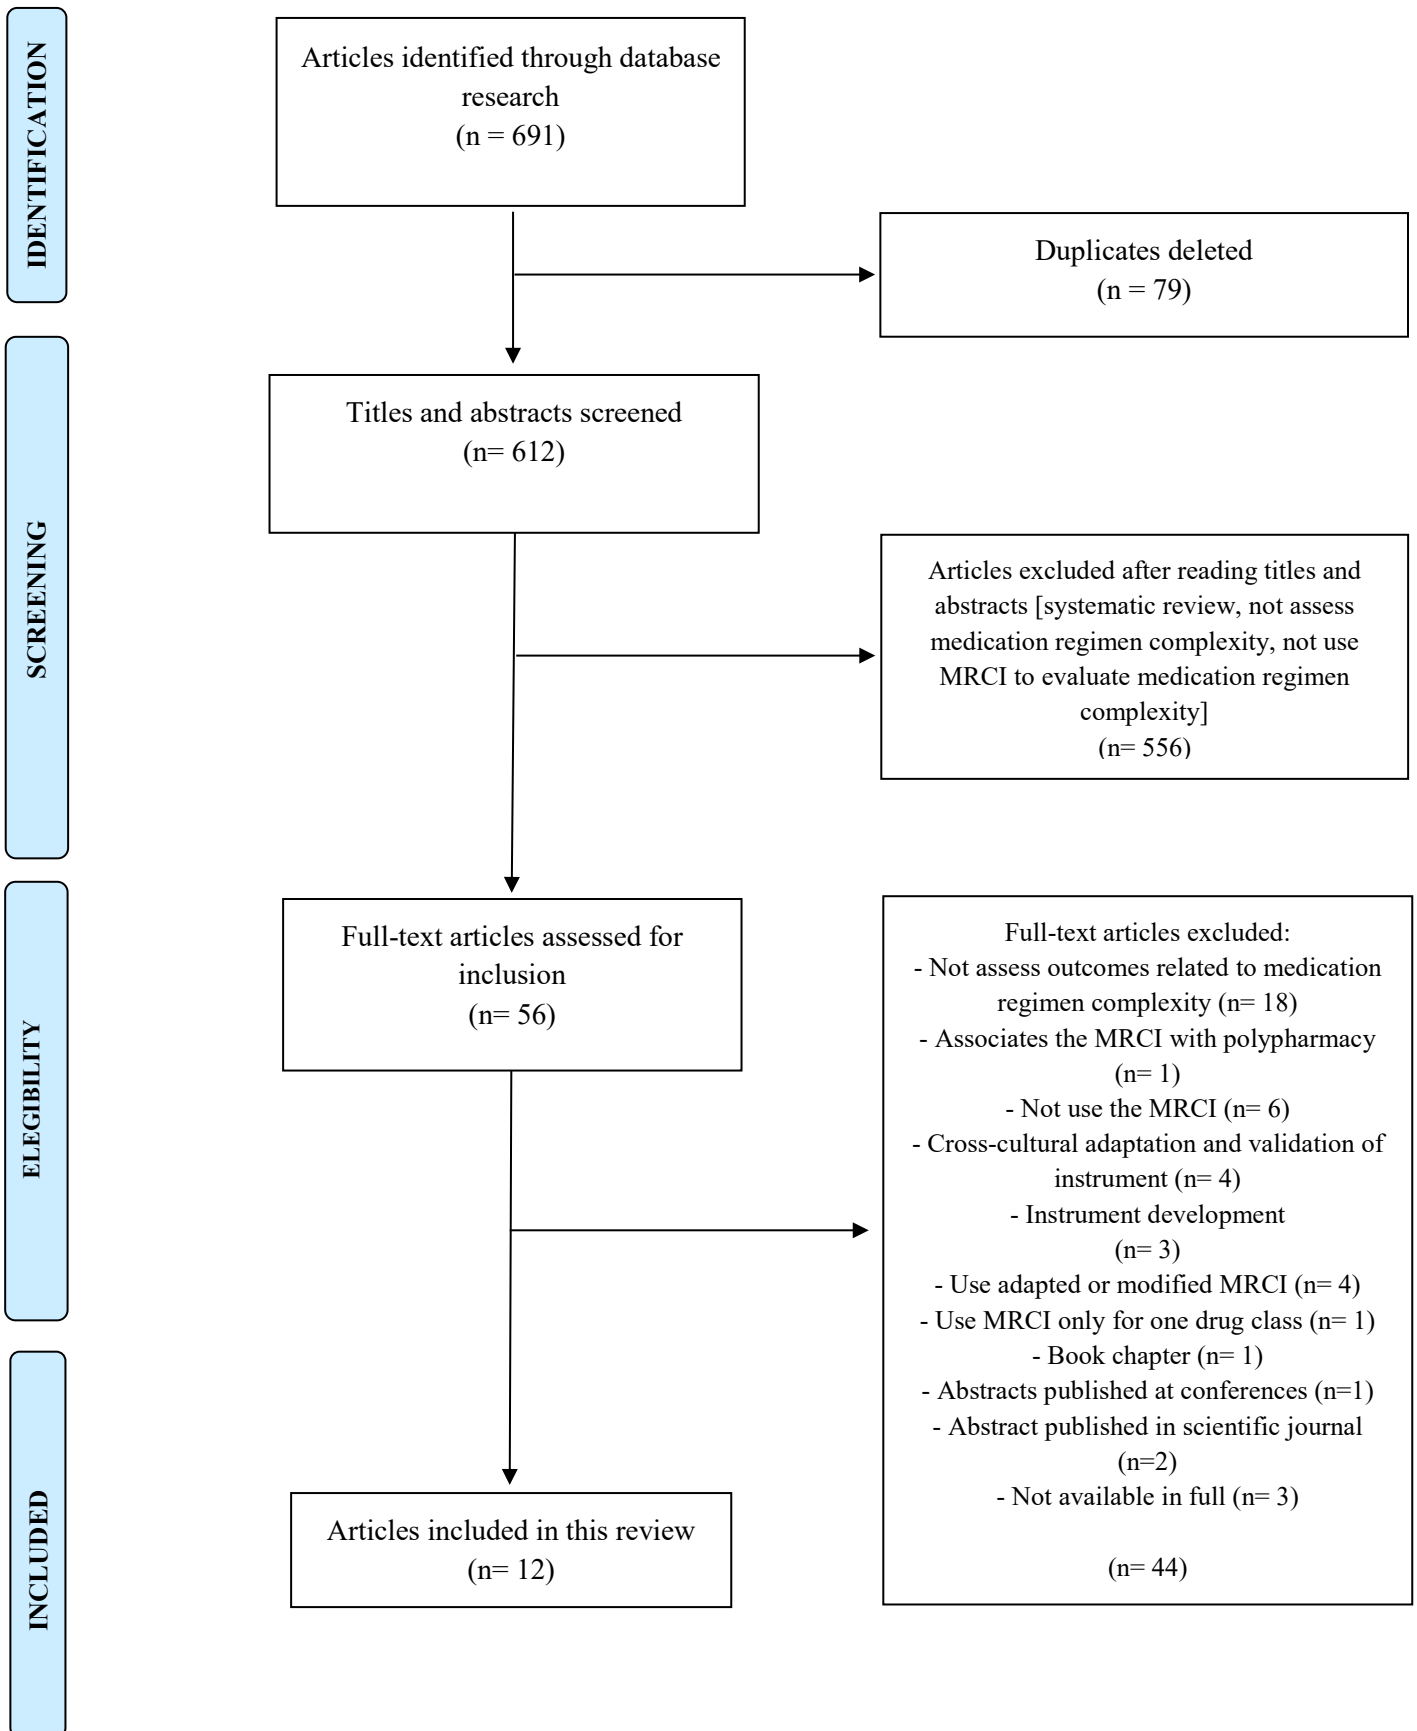

### APPENDIX 3 – List of excluded articles after reviewed of full text

| Author                  | Title                                                                                                                       | Journal                                                                  | Reason for exclusion                                                                       |
|-------------------------|-----------------------------------------------------------------------------------------------------------------------------|--------------------------------------------------------------------------|--------------------------------------------------------------------------------------------|
| Acurcio et al., 2009    | Complexity of therapeutic regimens prescribed for elderly retirees, Belo Horizonte/MG, Brazil                               | Revista da Associação Médica Brasileira                                  | It did not use the MRCI to measure medication regimen complexity                           |
| Al-Jazairi et al., 2017 | Impact of a medication reconciliation program on cardiac surgery patients                                                   | Asian Cardiovascular & Thoracic Annals                                   | It did not relate medication regimen complexity with health outcomes, but to discrepancies |
| Barnason et al., 2010   | Pilot testing of a medication self-management transition intervention for heart failure patients                            | Western Journal of Nursing Research                                      | It did not relate medication regimen complexity with health outcomes                       |
| Bryant et al., 2016     | Evaluating Patient-Level Medication Regimen Complexity Over Time in Heart Transplant Recipients                             | The Annals of Pharmacotherapy                                            | It did not evaluate health outcomes, just quantified medication regimen complexity         |
| Cadogan et al., 2016    | Appropriate Polypharmacy and Medicine Safety: When Many is not Too Many                                                     | Drug Safety                                                              | It did not use the MRCI to measure medication regimen complexity                           |
| Cardone et al., 2011    | Quantifying home medication regimen changes and quality of life in patients receiving nocturnal home hemodialysis           | Hemodialysis international. International Symposium on Home Hemodialysis | It did not evaluate health outcomes, just quantified medication regimen complexity         |
| Cecere et al., 2012     | Adherence to long-acting inhaled therapies among patients with chronic obstructive pulmonary disease (COPD)                 | International Journal of Chronic Obstructive Pulmonary Disease           | It did not use the MRCI to measure medication regimen complexity                           |
| Chang et al., 2017      | Medication regimen complexity and prevalence of potentially inappropriate medicines in older patients after hospitalisation | International Journal of Clinical Pharmacy                               | It did not evaluate health outcomes, just quantified medication regimen complexity         |
| Cobretti et al., 2017   | Medication regimen complexity in ambulatory older adults with heart failure                                                 | Clinical Interventions in Aging                                          | It used adapted MRCI                                                                       |
| Correr et al., 2011     | Effects of a pharmacotherapy follow-up in community pharmacies on type 2 diabetes patients in Brazil                        | International Journal of Clinical Pharmacy                               | It did not relate medication regimen complexity with clinical outcomes                     |

| <b>Author</b>               | <b>Title</b>                                                                                                                                                            | <b>Journal</b>                                                                                                 | <b>Reason for exclusion</b>                                                                                               |
|-----------------------------|-------------------------------------------------------------------------------------------------------------------------------------------------------------------------|----------------------------------------------------------------------------------------------------------------|---------------------------------------------------------------------------------------------------------------------------|
| Cortes et al., 2017         | Influence of hospital admission in the pharmacotherapy complexity of HIV+ patients                                                                                      | Farmacia Hospitalaria: Organo Oficial de Expresion Cientifica de La Sociedad Espanola de Farmacia Hospitalaria | The study measured medication regimen complexity through the MRCI tool adapted by University of Colorado in HIV+ patients |
| Pablos-Velasco et al., 2014 | Current level of glycaemic control and its associated factors in patients with type 2 diabetes across Europe: data from the PANORAMA study                              | Clinical Endocrinology                                                                                         | It did not evaluate medication regimen complexity                                                                         |
| Fortuna et al., 2015        | Medication regimen complexity evaluation in a hypertensive Portuguese population                                                                                        | International Journal of Clinical Pharmacy                                                                     | The study was a publication at conferences                                                                                |
| George et al., 2004         | Development and validation of the medication regimen complexity index                                                                                                   | The Annals of Pharmacotherapy                                                                                  | The study developed and validated a MRCI tool                                                                             |
| Hirsch et al., 2014         | Validation of a patient-level medication regimen complexity index as a possible tool to identify patients for medication therapy management intervention                | Pharmacotherapy                                                                                                | The study validated the MRCI                                                                                              |
| Hirsch et al., 2015         | Documenting and describing the methods and value of medication therapy management (MTM) programs                                                                        | Advances in Medicine and Biology                                                                               | The study was a book chapters                                                                                             |
| Ho et al., 2017             | Associations among medication regimen complexity, medical specialty, and medication possession ratio in newly diagnosed hypertensive patients: A population-based study | Medicine                                                                                                       | The study used MRCI to newly diagnosed hypertensive patients, without relation with health outcomes                       |
| Kai Sun et al., 2017        | Are Chinese-American rheumatology patients who use traditional Chinese medicine less adherent to prescribed western medications? Arthritis and Rheumatology, 69         | -                                                                                                              | The study was a publication at conferences                                                                                |
| Leblebici et al., 2018      | Medication adherence and medication regimen complexity of patients with polypharmacy at community pharmacy setting                                                      | International Journal of Clinical Pharmacy                                                                     | Abstract published in scientific journal                                                                                  |
| Lepelley et al., 2018       | Electronic Medication Regimen Complexity Index at admission and                                                                                                         | International Journal for Quality in Health Care                                                               | The study used modified MRCI                                                                                              |

| Author                  | Title                                                                                                                                                                  | Journal                                                 | Reason for exclusion                                                                                                            |
|-------------------------|------------------------------------------------------------------------------------------------------------------------------------------------------------------------|---------------------------------------------------------|---------------------------------------------------------------------------------------------------------------------------------|
|                         | complications during hospitalization in medical wards: a tool to improve quality of care?                                                                              |                                                         |                                                                                                                                 |
| Libby et al., 2013      | Patient-level medication regimen complexity across populations with chronic disease                                                                                    | Clinical Therapeutics                                   | It did not relate medication regimen complexity with health outcomes. The study quantified MRCI in patient with chronic disease |
| Linnebur et al., 2014   | Patient-level medication regimen complexity in older adults with depression                                                                                            | Clinical Therapeutics                                   | It did not relate medication regimen complexity with health outcomes. The study quantified MRCI in patient with depression      |
| Logan et al., 2014      | Rates and predictors of adherence to psychotropic medications in children with autism spectrum disorders                                                               | Journal of Autism and Developmental Disorders           | The study used modified MRCI for patients with autism spectrum disorders                                                        |
| Martin et al., 2007     | The Antiretroviral Regimen Complexity Index. A novel method of quantifying regimen complexity                                                                          | Journal of Acquired Immune Deficiency Syndromes         | The study used modified MRCI. Proposed a method to evaluate the antiretrovirals regimen                                         |
| Matza et al., 2014      | Health state utilities associated with attributes of treatments for hepatitis C. European Journal of Health Economics                                                  | European Journal of Health Economics                    | It did not use the MRCI to measure medication regimen complexity                                                                |
| Mcdonald et al., 2013   | Automating the medication regimen complexity index. Journal of the American Medical Informatics Association                                                            | Journal of the American Medical Informatics Association | The study did not evaluate health outcomes                                                                                      |
| Mcdonald et al., 2015   | Outcomes of clinical decision support (CDS) and correlates of CDS use for home care patients with high medication regimen complexity: a randomized trial               | Journal of Evaluation in Clinical Practice              | It did not relate medication regimen complexity with health outcomes                                                            |
| Metz et al., 2014       | Patient-Level Medication Regimen Complexity in Patients With HIV                                                                                                       | The Annals of Pharmacotherapy                           | The study did not evaluate health outcomes. It evaluated MRCI in Patients with HIV                                              |
| Moczygamba et al., 2011 | Impact of telephone medication therapy management on medication and health-related problems, medication adherence, and medicare part D drug costs: A 6-month follow up | American Journal Geriatric Pharmacotherapy              | It did not use the MRCI to measure medication regimen complexity                                                                |

| <b>Author</b>            | <b>Title</b>                                                                                                                                                                                                                      | <b>Journal</b>                             | <b>Reason for exclusion</b>                                                                                                               |
|--------------------------|-----------------------------------------------------------------------------------------------------------------------------------------------------------------------------------------------------------------------------------|--------------------------------------------|-------------------------------------------------------------------------------------------------------------------------------------------|
| Morello et al., 2016     | Clinical Outcomes Associated With a Collaborative Pharmacist-Endocrinologist Diabetes Intense Medical Management "Tune Up" Clinic in Complex Patients                                                                             | The Annals of Pharmacotherapy              | It did not relate medication regimen complexity with health outcomes                                                                      |
| Obreli-neto et al., 2011 | Effect of a 36-month pharmaceutical care program on pharmacotherapy adherence in elderly diabetic and hypertensive patients                                                                                                       | International Journal of Clinical Pharmacy | It did not relate medication regimen complexity with health outcomes                                                                      |
| Okuyan et al., 2016      | Validation of the Turkish version of medication regimen complexity index among elderly patients                                                                                                                                   | Journal of Evaluation in Clinical Practice | The study validated the MRCI to Turkish                                                                                                   |
| Olson et al., 2014       | Optimization of decision support tool using medication regimens to assess rehospitalization risks                                                                                                                                 | Applied Clinical Informatics               | The study created a cut-off point to identify how much medication regimen complexity influences on readmission, but does not show results |
| Olson et al., 2014       | Automation of a highrisk medication regime algorithm in a home health care population                                                                                                                                             | Journal of Biomedical Informatics          | It did not relate medication regimen complexity with health outcomes                                                                      |
| Patel et al., 2016       | Medication Complexity, Medication Number, and Their Relationships to Medication Discrepancies                                                                                                                                     | The Annals of Pharmacotherapy              | It did not relate medication regimen complexity with health outcomes, but with discrepancies                                              |
| Remondi et al., 2014     | Non-adherence to continuous treatment and associated factors: Prevalence and determinants in adults 40 years and older [Nãoadesão ao tratamento medicamentoso contínuo: Prevalência e determinantes em adultos de 40 anos e mais] | Cadernos de Saúde Pública                  | It did not use the MRCI to measure medication regimen complexity                                                                          |
| Rose et al., 2015        | Effect evaluation of an interprofessional medication therapy management approach for multimorbid patients in primary care: a cluster-randomized controlled trial in community care (West Gem study protocol)                      | BMC Family Practice                        | It did not relate medication regimen complexity with health outcomes                                                                      |



| <b>Author</b>                 | <b>Title</b>                                                                                                                                               | <b>Journal</b>                             | <b>Reason for exclusion</b>                                          |
|-------------------------------|------------------------------------------------------------------------------------------------------------------------------------------------------------|--------------------------------------------|----------------------------------------------------------------------|
| Saez de lafuente et al., 2016 | Cross-cultural Adaptation and Validation of the Medication Regimen Complexity Index Adapted to Spanish                                                     | The Annals of Pharmacotherapy              | The study validated the MRCI to Spanish                              |
| Serper et al., 2013           | Quantifying medication regimen complexity in liver transplantation                                                                                         | Hepatology                                 | The study was a publication at conferences                           |
| Stange et al., 2012           | Development and psychometric evaluation of the German version of the Medication Regimen Complexity Index (MRCI-D)                                          | Journal of Evaluation in Clinical Practice | The study developed and validated the MRCI to German                 |
| Stange et al., 2013           | Reducing cardiovascular medication complexity in a German university hospital: effects of a structured pharmaceutical management intervention on adherence | Journal of Managed Care Pharmacy           | It did not relate medication regimen complexity with health outcomes |
| Sun et al., 2017              | Association between use of traditional Chinese medicine and medication adherence among Chinese-American rheumatology patients                              | Annals of the Rheumatic Diseases           | Abstract published in scientific journal                             |
| Vries et al., 2014            | Medication beliefs, treatment complexity, and non-adherence to different drug classes in patients with type 2 diabetes                                     | Journal of Psychosomatic Research          | It did not use the MRCI to measure medication regimen complexity     |
| Wimmer et al., 2015           | Medication regimen complexity in older people with and without medication-administration problems: A nested case-control study                             | International Journal of Clinical Pharmacy | The study was a publication at conferences                           |

Abbreviation: MRCI - Medication Regimen Complexity Index.

## APPENDIX 4 - Quality assessment of cohort studies by NOS

| Author | Study design | Selection                                |                                     |                           | Comparability                                                            |                             | Outcome               |                                                 | Score |                                  |
|--------|--------------|------------------------------------------|-------------------------------------|---------------------------|--------------------------------------------------------------------------|-----------------------------|-----------------------|-------------------------------------------------|-------|----------------------------------|
|        |              | Representativeness of the Exposed Cohort | Selection of the Non-Exposed Cohort | Ascertainment of Exposure | Demonstration That Outcome of Interest Was Not Present at Start of Study | Based on design or analysis | Assessment of Outcome | Was Follow-Up Long Enough for Outcomes to Occur |       | Adequacy of Follow Up of Cohorts |
| [32]*  | Cohort       | *                                        | *                                   | *                         | *                                                                        | *                           | *                     | *                                               | *     | 8                                |
| [33]*  | Cohort       | *                                        | *                                   | *                         | -                                                                        | **                          | *                     | -                                               | -     | 6                                |
| [34]*  | Cohort       | *                                        | *                                   | Not clear                 | -                                                                        | *                           | *                     | *                                               | -     | 5                                |
| [35]*  | Cohort       | Not clear                                | *                                   | *                         | *                                                                        | **                          | *                     | *                                               | -     | 7                                |
| [36]*  | Cohort       | *                                        | *                                   | *                         | -                                                                        | *                           | *                     | -                                               | *     | 6                                |
| [38]*  | Cohort       | *                                        | *                                   | *                         | -                                                                        | *                           | *                     | -                                               | *     | 6                                |
| [39]*  | Cohort       | *                                        | *                                   | *                         | -                                                                        | *                           | *                     | *                                               | *     | 7                                |
| [40]*  | Cohort       | *                                        | *                                   | *                         | Not clear                                                                | **                          | -                     | *                                               | -     | 6                                |
| [41]*  | Cohort       | *                                        | *                                   | *                         | Not clear                                                                | *                           | *                     | *                                               | -     | 6                                |
| [42]*  | Cohort       | Not clear                                | *                                   | *                         | Not clear                                                                | *                           | Not clear             | *                                               | -     | 4                                |

Abbreviation: NOS - Newcastle-Ottawa Scale.

\* Studies that scored  $\geq 6$  stars were considered of good quality

## APPENDIX 5 - Quality assessment of case-control studies by NOS

| Author | Study design | Selection                 |                                 | Comparability         |                        |                             | Outcome                   |                                                     | Score     |                   |
|--------|--------------|---------------------------|---------------------------------|-----------------------|------------------------|-----------------------------|---------------------------|-----------------------------------------------------|-----------|-------------------|
|        |              | Case definition adequate? | Representativeness of the cases | Selection of Controls | Definition of Controls | Based on design or analysis | Ascertainment of Exposure | Same method of ascertainment for cases and controls |           | Non-Response rate |
| [31]*  | Case-control | *                         | *                               | *                     | -                      | **                          | *                         | *                                                   | *         | 8                 |
| [37]   | Case-control | *                         | *                               | Not clear             | Not clear              | *                           | *                         | *                                                   | Not clear | 5                 |

Abbreviation: NOS - Newcastle-Ottawa Scale.

\* Studies that scored  $\geq 6$  stars were considered of good quality.
